# Supplementary material
Source: Springer Nature journal article supplement (https://www.springermedizin.de/resource/supplementary/13054_2010_9378_MOESM3_ESM.pdf/9706012)
Supplement: MOESM3 [file 9706012]

## FFP group

Distribution of transfusion ratios (FFP:RBC)  
(n = 601)

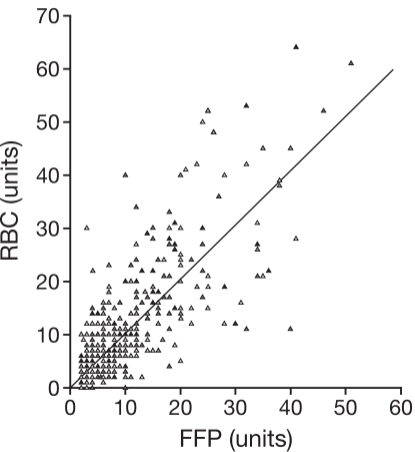

## Fibrinogen-PCC group

Distribution of transfusion ratios (Fibrinogen:RBC)  
(n = 80)

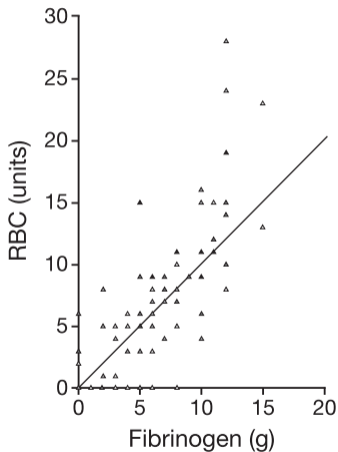

Distribution of transfusion ratios (PCC:RBC)  
(n = 80)

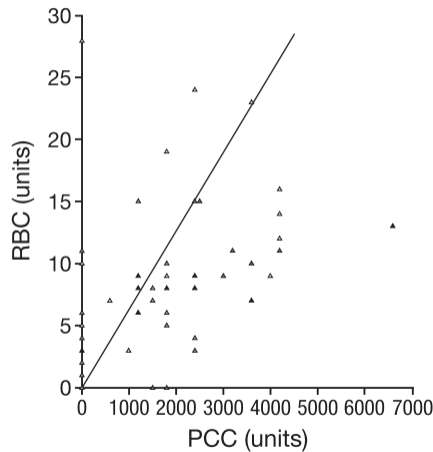

1 patient  
  2 patients  
  3 patients  
  >3 patients
